# Supplementary material for: Expression profiles and functional prediction of histone acetyltransferases of the MYST family in kidney renal clear cell carcinoma
Source: Springer Nature journal article supplement (doi:10.1186/s12885-023-11076-x), 2023-06-26
Supplement: MOESM1 [file 25537738]

**Supplemental Table S1. Patient information**

| Number | Gender | Age | Primary cancer | Pathological classification | T   | N  | M  | Tumor stage <sup>1</sup> |
|--------|--------|-----|----------------|-----------------------------|-----|----|----|--------------------------|
| 1      | female | 44  | Y              | KIRC                        | T2a | N0 | M0 | Stage 2                  |
| 2      | female | 72  | Y              | KIRC                        | T2a | N0 | M0 | Stage 2                  |
| 3      | female | 66  | Y              | KIRC                        | T2a | N0 | M0 | Stage 2                  |
| 4      | female | 57  | Y              | KIRC                        | T2a | N0 | M0 | Stage 2                  |
| 5      | female | 73  | Y              | KIRC                        | T2a | N0 | M0 | Stage 2                  |
| 6      | man    | 62  | Y              | KIRC                        | T2b | N0 | M0 | Stage 2                  |
| 7      | man    | 71  | Y              | KIRC                        | T2a | N0 | M0 | Stage 2                  |
| 8      | female | 57  | Y              | KIRC                        | T2a | N0 | M0 | Stage 2                  |
| 9      | female | 66  | Y              | KIRC                        | T2a | N0 | M0 | Stage 2                  |
| 10     | man    | 57  | Y              | KIRC                        | T2a | N0 | M0 | Stage 2                  |
| 11     | man    | 59  | Y              | KIRC                        | T2a | N0 | M0 | Stage 2                  |
| 12     | man    | 56  | Y              | KIRC                        | T2a | N0 | M0 | Stage 2                  |
| 13     | man    | 53  | Y              | KIRC                        | T2a | N0 | M0 | Stage 2                  |
| 14     | man    | 57  | Y              | KIRC                        | T3  | N0 | M0 | Stage 3                  |
| 15     | female | 48  | Y              | KIRC                        | T3  | N0 | M0 | Stage 3                  |
| 16     | female | 66  | Y              | KIRC                        | T3  | N0 | M0 | Stage 3                  |
| 17     | man    | 65  | Y              | KIRC                        | T3  | N0 | M0 | Stage 3                  |
| 18     | man    | 61  | Y              | KIRC                        | T3  | N0 | M0 | Stage 3                  |
| 19     | female | 67  | Y              | KIRC                        | T1  | N1 | M0 | Stage 3                  |
| 20     | man    | 49  | Y              | KIRC                        | T2b | N2 | M0 | Stage 4                  |

<sup>1</sup> the 7th edition of the AJCC cancer staging manual

KIRC: Kidney Renal Clear Cell Carcinoma
