# Supplementary material for: Expression profiles and functional prediction of histone acetyltransferases of the MYST family in kidney renal clear cell carcinoma
Source: Springer Nature journal article supplement (doi:10.1186/s12885-023-11076-x), 2023-06-26
Supplement: MOESM2 [file 25537738]

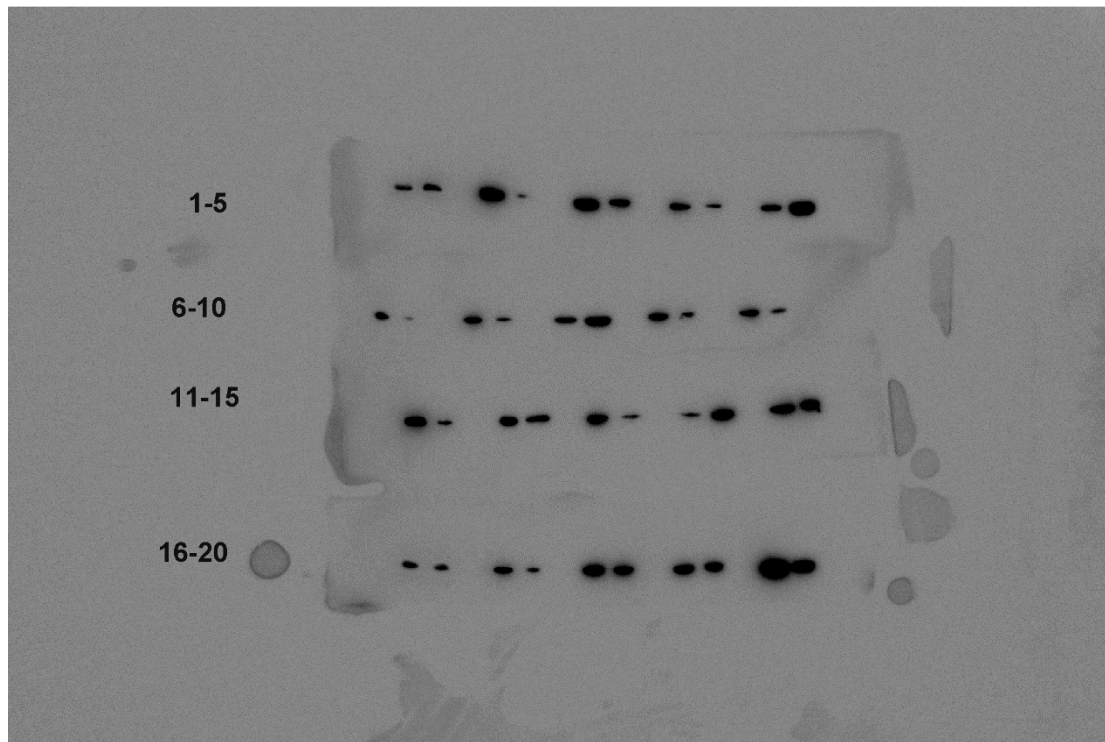

Original western blotting results showing KAT5 protein levels (Figure 3B). After SDS-PAGE, proteins were transferred onto a PVDF membrane. According to the pre-stained protein markers (Thermo Scientific no.26616), the membrane between 40 and 70 kDa region was cut off for immunoblotting with anti-KAT5 antibody (the molecular weight of KAT5 is 58 kDa). By doing so, less anti-KAT5 antibody was used for this experiment. 1-5, 6-10,11-15 and 16-20 samples were on four respective cut PVDF membranes.

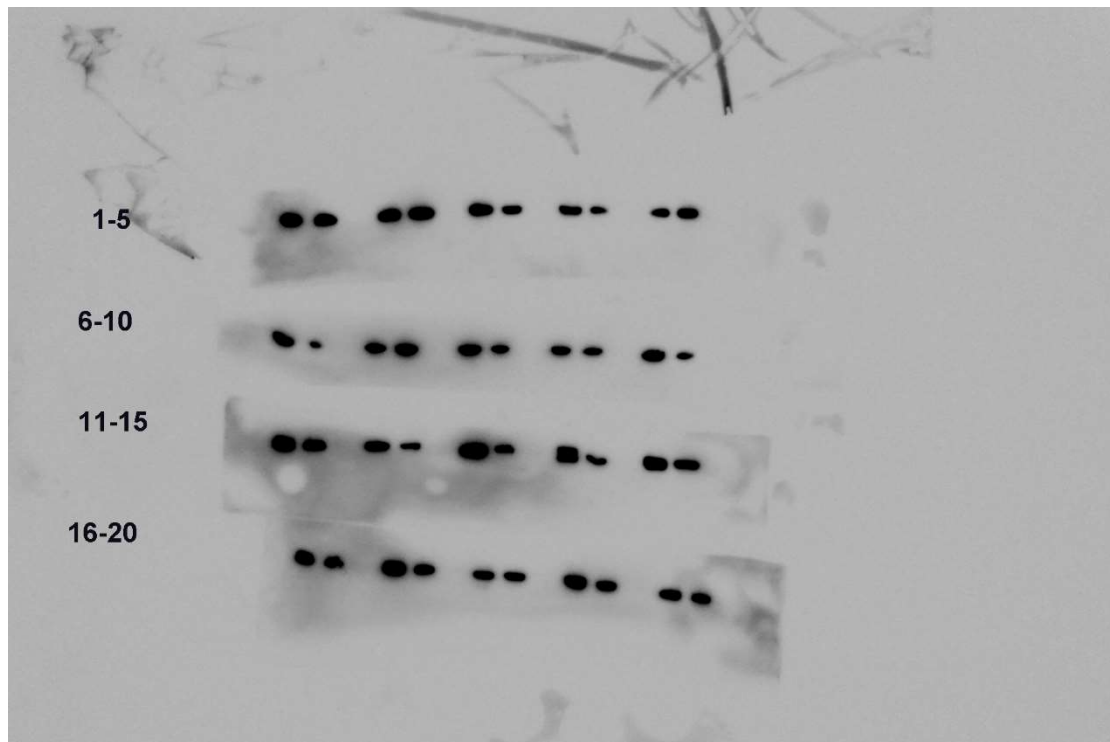

Original western blotting results showing KAT6A protein levels (Figure 3B). After SDS-PAGE, proteins were transferred onto a PVDF membrane. According to the pre-stained protein markers (Thermo Scientific no.26616), >100 kDa region of the membrane was cut off for immunoblotting with anti-KAT6A antibody (the molecular weight of KAT6A is 225 kDa). By doing so, less anti-KAT6A antibody was used for this experiment. 1-5, 6-10, 11-15 and 16-20 samples were on four respective cut PVDF membranes.

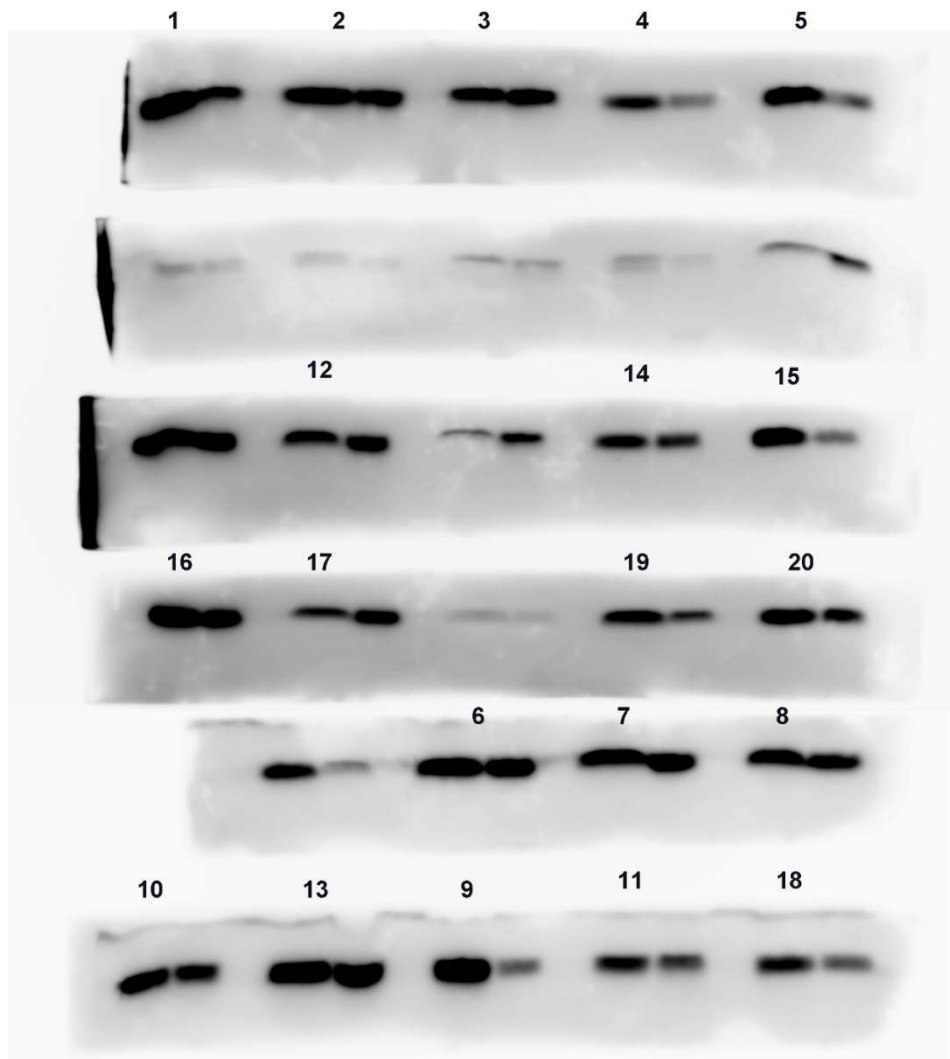

Original western blotting results showing KAT6B protein levels (Figure 3B). After SDS-PAGE, proteins were transferred onto a PVDF membrane. According to the pre-stained protein markers (Thermo Scientific no.26616), >100 kDa region of the membrane was cut off for immunoblotting with anti-KAT6B antibody (the molecular weight of KAT6B is 231 kDa). By doing so, less anti-KAT6BA antibody was used for this experiment.

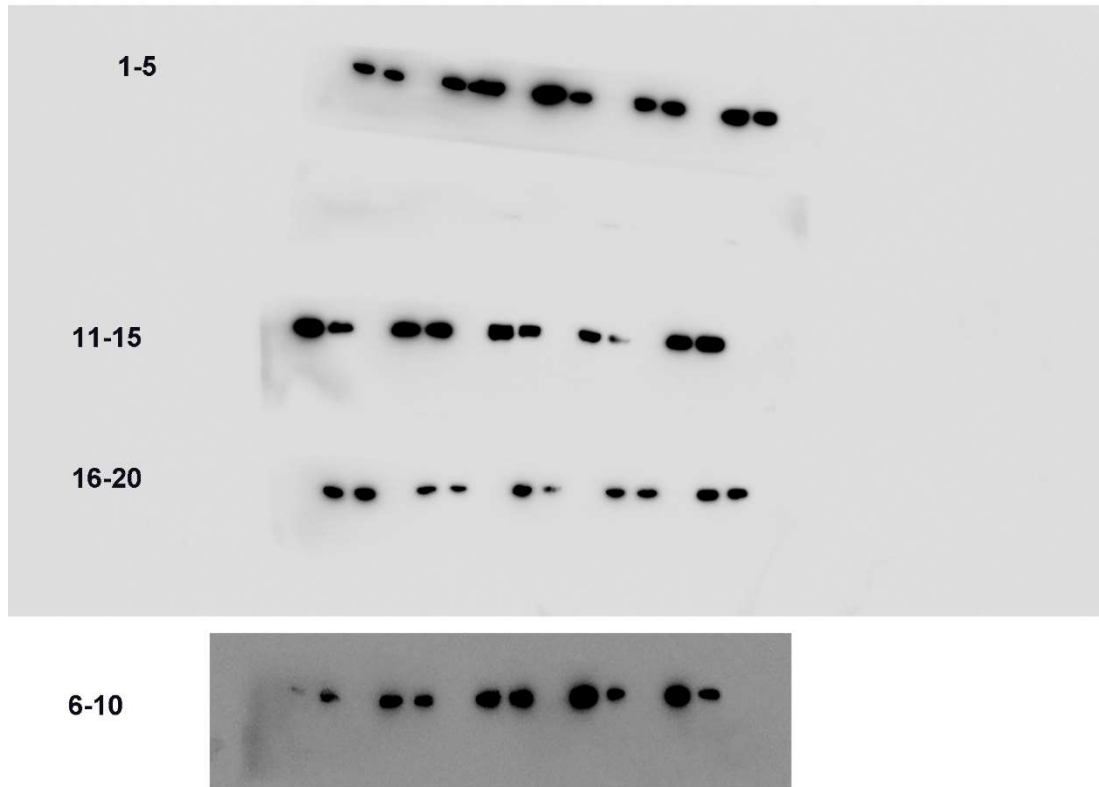

Original western blotting results showing KAT7 protein levels (Figure 3B). After SDS-PAGE, proteins were transferred onto a PVDF membrane. According to the pre-stained protein markers (Thermo Scientific no.26616), the membrane between 55 and 100 kDa region was cut off for immunoblotting with anti-KAT7 antibody (the molecular weight of KAT7 is 71 kDa).

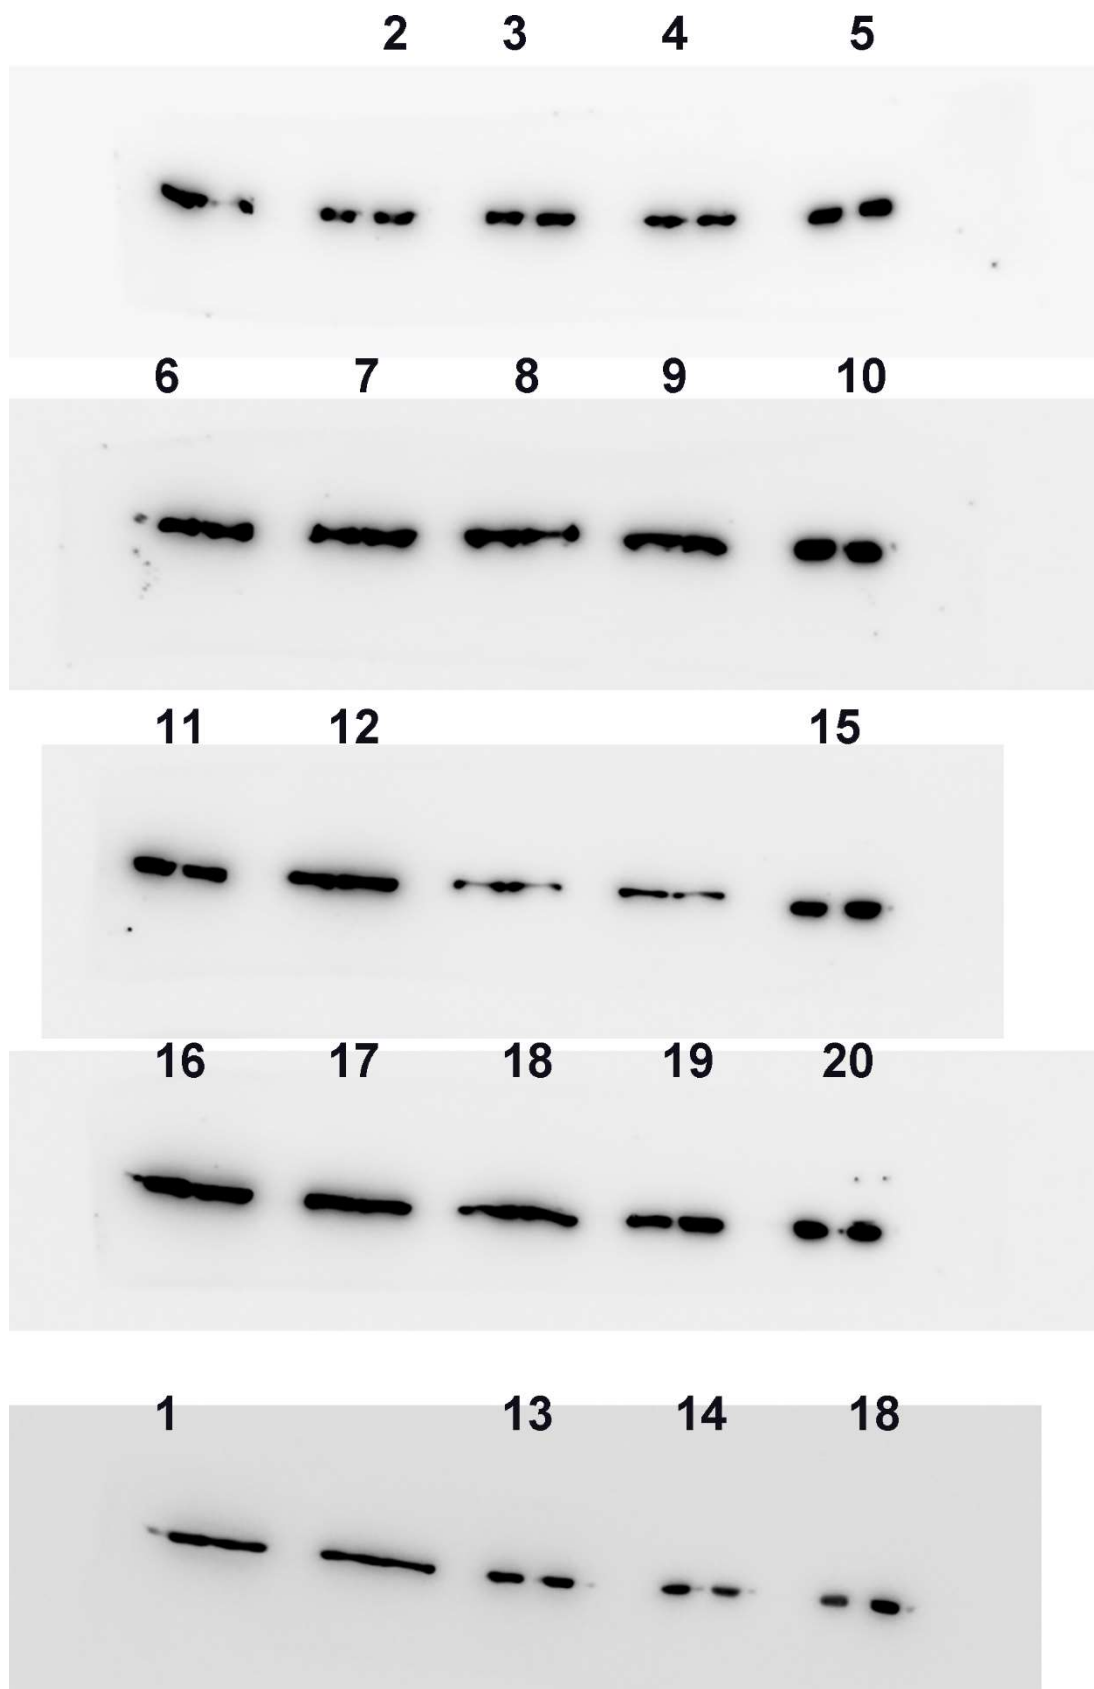

Original western blotting results showing  $\beta$ -actin protein levels (Figure 3B).

After SDS-PAGE, proteins were transferred onto a PVDF membrane.

According to the pre-stained protein markers (Thermo Scientific no.26616), the membrane between 35 and 55 kDa region was cut off for immunoblotting with anti- $\beta$ -actin antibody (the molecular weight of  $\beta$ -actin is 42 kDa).
