# Supplementary material for: Expression profiles and functional prediction of histone acetyltransferases of the MYST family in kidney renal clear cell carcinoma
Source: Springer Nature journal article supplement (doi:10.1186/s12885-023-11076-x), 2023-06-26
Supplement: MOESM3 [file 25537738]

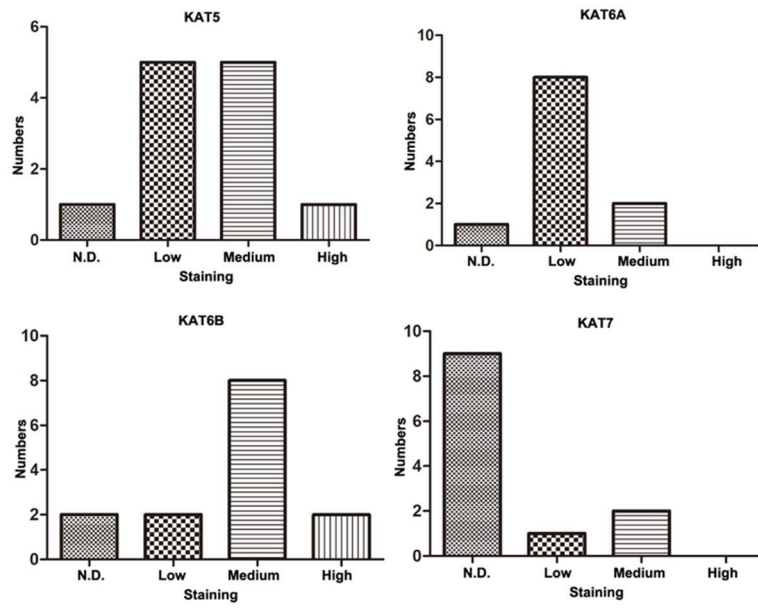

**Supplemental** The protein expressions of MYST HATs detected by immunohistochemistry The data were downloaded from Human Protein Atlas web. Antibody HPA063266 for KAT6A; Antibody HPA044470 for KAT7; Antibody HPA006104 for KAT6B; Antibody HPA016953 for KAT5
