# Supplementary material for: Expression profiles and functional prediction of histone acetyltransferases of the MYST family in kidney renal clear cell carcinoma
Source: Springer Nature journal article supplement (doi:10.1186/s12885-023-11076-x), 2023-06-26
Supplement: MOESM4 [file 25537738]

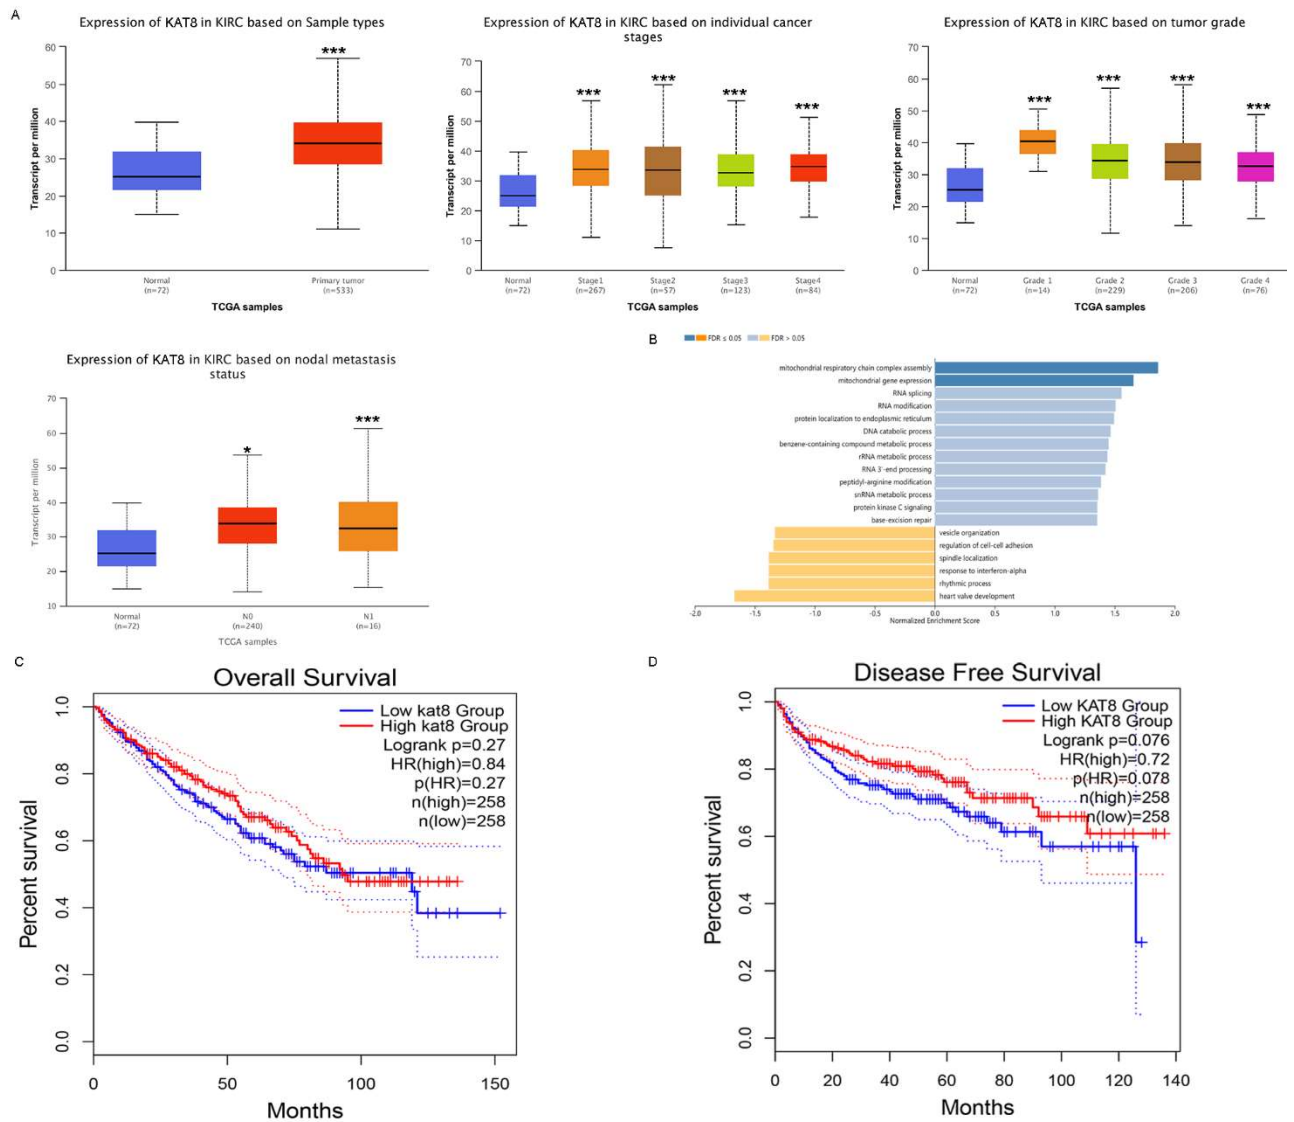

**Supplemental Prognostic significance of KAT8 in patients with KIRC** (A) Expression of KAT8 in KIRC based on individual cancer stages, metastasis status and tumor grade. \*,  $P < 0.05$ ; \*\*,  $P < 0.01$ ; \*\*\*,  $P < 0.001$ . Compared with to normal tissues (UALCAN database). (B) GSEA analysis of KAT8. Kaplan-Meier curves exhibited the relationships between MYST HAT expression and (C) overall survival or (D) disease-free survival of KIRC patients (GEPID database).
